1 **Rapid genomic surveillance of SARS-CoV-2 in a dense urban community using**  
2 **environmental (sewage) samples**

3 **Genomic environmental surveillance of SARS-CoV-2 using sewage samples**

4 Rajindra Napat<sup>1,2</sup>, Prajwol Manandhar<sup>1,2</sup>, Ashok Chaudhary<sup>1</sup>, Bishwo Shrestha<sup>1</sup>, Ajit Poudel<sup>1,2</sup>,  
5 Roji Raut<sup>1</sup>, Saman Pradhan<sup>1,2</sup>, Samita Raut<sup>1</sup>, Sujala Mathema<sup>1</sup>, Rajesh Rajbhandari<sup>1,2</sup>, Sameer  
6 Dixit<sup>1</sup>, Jessica S. Schwind<sup>3</sup>, Christine K Johnson<sup>4</sup>, Jonna K Mazet<sup>4</sup>, Dibesh Karmacharya<sup>1,2</sup> \*

7 <sup>1</sup> One Health Research Division, Center for Molecular Dynamics Nepal, Thapathali-11,  
8 Kathmandu 44600, Nepal

9 <sup>2</sup> Virology Division, BIOVAC Nepal Pvt. Ltd., Nala, Banepa, Nepal

10 <sup>3</sup> Department of Biostatistics, Epidemiology, and Environmental Health Sciences, Jiann-Ping Hsu  
11 College of Public Health, Georgia Southern University, Statesboro, GA 30458, USA

12 <sup>4</sup> One Health Institute, School of Veterinary Medicine, University of California, Davis, USA

13 \*corresponding [dibesh@cmdn.org](mailto:dibesh@cmdn.org), [dibesh@biovacnepal.com](mailto:dibesh@biovacnepal.com)

14

## 15 **Abstract**

16 Understanding disease burden and transmission dynamics in resource-limited, developing  
17 countries like Nepal is often challenging due to a lack of adequate surveillance systems. These  
18 issues are exacerbated by limited access to diagnostic and research facilities throughout the  
19 country. Nepal has one of the highest COVID-19 case rates (915 cases per 100,000 people) in  
20 South Asia, with densely-populated Kathmandu experiencing the highest number of cases. Swiftly  
21 identifying case clusters and introducing effective intervention programs is crucial to mounting an  
22 effective containment strategy. The rapid identification of circulating SARS-CoV-2 variants can  
23 also provide important information on viral evolution and epidemiology. Genomic-based  
24 environmental surveillance can help in the early detection of outbreaks before clinical cases are  
25 recognized, and identify viral micro-diversity that can be used for designing real-time risk-based  
26 interventions. This research aimed to develop a genomic-based environmental surveillance system  
27 by detecting and characterizing SARS-CoV-2 in sewage samples of Kathmandu using portable  
28 next-generation DNA sequencing devices. Out of 20 selected sites in the Kathmandu Valley,  
29 sewage samples from 16 (80%) sites had detectable SARS-CoV-2. A heat-map was created to  
30 visualize transmission activity in the community based on viral load intensity and corresponding  
31 geospatial data. Further, 41 mutations were observed in the SARS-CoV-2 genome. Some detected  
32 mutations (n=9, 2%) were novel and yet to be reported in the global database, with one indicating  
33 a frameshift deletion in the spike gene. We also observed more transition than transversion on  
34 detected mutations, indicating rapid viral evolution in the host. Our study has demonstrated the  
35 feasibility of rapidly obtaining vital information on community transmission and disease dynamics  
36 of SARS-CoV-2 using genomic-based environmental surveillance.

37

## 38 **Introduction**

39 In the past twenty years, several diseases caused by coronavirus have posed significant global  
40 health challenges- including Severe Acute Respiratory Syndrome (SARS, 2002), Middle East  
41 Respiratory Syndrome (MERS, 2012), as well as the current pandemic of COVID-19 [1,2].  
42 COVID-19 is caused by a single-stranded, positive-sense RNA virus (SARS-CoV-2) which  
43 belongs to the *Coronaviridae* family [2]. The outbreak that was first detected in Wuhan (China)  
44 was declared a pandemic by the World Health Organization (WHO) on 11 March 2020, as it  
45 rapidly spread in over 114 countries [3]. As of January 14 (2021), over 108 million cases have  
46 been reported worldwide and have claimed over 2.3 million deaths [4]. In Nepal, there are 272,840  
47 confirmed COVID-19 cases and 2055 deaths [5]. Gastrointestinal (GI) symptoms are often  
48 common in patients infected with SAR

49 S-CoV-2, with one hospital in the US reporting 70% of GI patients testing positive for coronavirus  
50 [6–9]. Although the primary source of transmission is through respiratory aerosol, studies have  
51 confirmed fecal shedding [10,11] and potential fecal-oral transmission of coronavirus [12,13].  
52 Since SARS-CoV-2 is shed through feces and have also been detected in wastewater [14,15],  
53 detecting the virus in sewage and wastewater can serve as an early detection method for identifying  
54 communities with circulating virus in densely populated cities.

55 Environmental surveillance (ES) offers a complementary and more feasible approach to clinical  
56 disease surveillance. This approach provides unbiased information on a population level and  
57 detects viral shedding by symptomatic and asymptomatic patients [1,16], thus providing a snapshot  
58 of the outbreak over an entire sewage catchment area and an early indication of clinical cases in  
59 the area [17]. Because not all symptomatic patients get tested due to reluctance or lack of access

60 to tests, clinical samples are not a sensitive indicator of the occurrence of cases in a given area  
61 [18,19]. As experienced by many countries, clinical and community- based COVID-19  
62 surveillance is expensive, technically challenging, and time-consuming, and therefore hard to  
63 implement in the manner needed to rapidly inform public health measures to contain the outbreak  
64 [10,20,21]. A longitudinal study conducted in Boston (USA) between March-April in 2020 showed  
65 a high correlation between environmental samples testing positive for the virus 4-10 days before  
66 symptoms presented in people in the sampled areas [16]. Wastewater sampling was as sensitive as  
67 stool sampling for viral detection during vaccine-derived poliovirus outbreaks in Cuba [22]. The  
68 versatility of environmental samples combined with the implementation of cheaper, user-friendly,  
69 and short turnaround sequencing tools such as MinION (Oxford Nanopore Technologies, UK) [23]  
70 will be invaluable in rapidly identifying viral strains and detecting clusters of infection going  
71 forward.

72 Whole-genome sequencing (WGS) of viral pathogens is frequently used in disease surveillance  
73 and monitoring, and the importance of genomic surveillance has been widely recognized as an  
74 important method of understanding viral evolution [24]. Portable and reliable sequencing tools  
75 such as MinION can play a crucial role in conducting genomic surveillance in a developing country  
76 like Nepal where access to high throughput DNA sequencing machines is limited. The pocket-  
77 sized and field-deployable, the next-generation sequencer has enabled real-time outbreak  
78 surveillance of several recent outbreaks of Zika, Ebola, and Lassa viruses [1]. Obtaining whole or  
79 partial genome sequences of the virus during outbreak is critical in understanding viral evolution  
80 and disease epidemiology, and can help design accurate diagnostic tests for rapidly evolving RNA  
81 viruses such as SARS-CoV-2 [25].

82 This study was conducted in some selected areas of Kathmandu (Nepal) to evaluate the  
83 effectiveness of SARS-CoV-2 detection and characterization from environmental samples using  
84 portable DNA sequencing technology (MinION). Studies in other countries have detected SARS-  
85 CoV-2 in environment samples collected from wastewater treatment plants (WWTP) [2,16,26–  
86 30]. However, Kathmandu has only one functional WWTP (out of five) and therefore, collecting  
87 all representative citywide sampling from WWTP is not possible. Since we had mapped sewage  
88 lines in some parts of the city for our ongoing surveillance of typhoid using environmental samples,  
89 we used the same sampling sites to conduct SARS-CoV-2 environmental surveillance. This cross-  
90 sectional study successfully detected, quantitated, and characterized the SARS-CoV-2 virus from  
91 environment samples collected from the wastewater outlets and utility holes within catchment  
92 areas, providing important information on the circulating strains of the virus in some communities  
93 of Kathmandu.

## 94 **Materials and Methods**

### 95 **Sewage sample collection and processing**

96 Much of the field sampling strategy was derived from our ongoing environmental surveillance  
97 work to determine the incidence of *Salmonella typhi* (the pathogen that causes Typhoid fever) in  
98 the Kathmandu valley, with an estimated population of over 4 million people [31]. As part of that  
99 study, we had comprehensively mapped sewage lines in the Lalitpur area of the Kathmandu valley.  
100 Also, we conducted field surveys to map out population size based on catchment areas. For our  
101 SARS-CoV-2 environmental surveillance, we used these sites and identified the catchment areas  
102 (n=20).

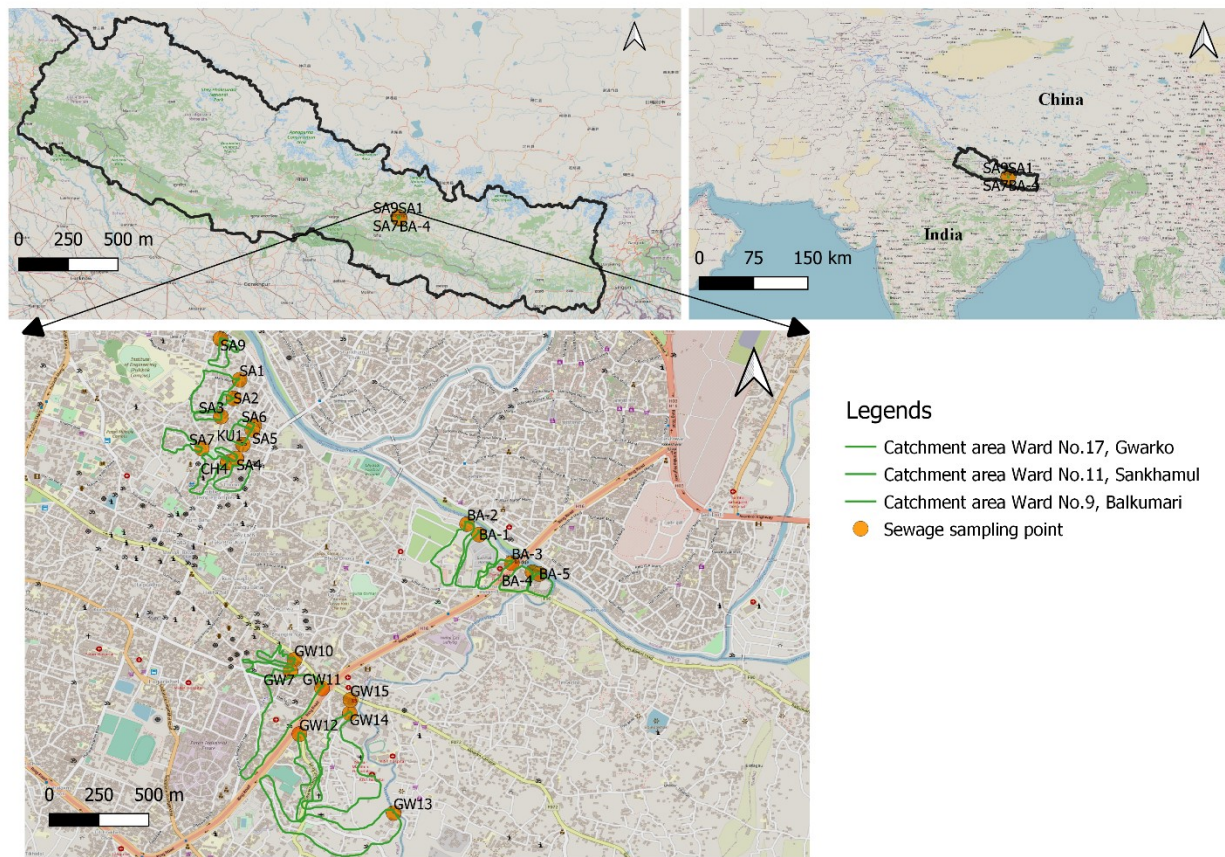



113 Using an optimized protocol for detection and characterization of SARS-CoV-2, sewage samples  
114 were collected for the environmental and genomic surveillance (July 26- December 1, 2020) of  
115 three wards (Ward 9- Balkumari; Ward 11- Sankhamul/Jwagal, and Ward 17- Gwarko) located in  
116 the Lalitpur Metropolitan city of the Kathmandu valley (Nepal).

117 Sewage samples were collected using an automated robotic pump (Biobot Analytics Inc.,  
118 Cambridge, USA). For protocol optimization, a total of 500ml of a composite (20.8 ml/hr) sample  
119 of 24 hours [16] was collected from the control site (APFH). But for the environmental  
120 surveillance, grab (50 ml) sample was preferred based upon outcome of optimization [34]. The  
121 probable reason for the consistent result in grab samples compared to the composite samples could  
122 be the dilution of viral particles by sewage discharge of non-viral peak hour [34]. The grab sewage  
123 samples were collected during the peak hour from 7:00AM to 9:00AM [35] based on the  
124 assumption that toilet activity and sewage discharge would be high during that time period.

125 The samples were transported immediately to our Kathmandu-based laboratory using cold chain  
126 for processing. Each sample was pasteurized at 60°C for 90 minutes in a water-bath [16] to  
127 inactivate any virus. Pasteurized samples were then subjected to differential centrifugation for  
128 virus segregation from sewage sludge by centrifuging at 3000 rpm for 30 minutes to pellet the  
129 bacterial cells and debris. The pellet was discarded, and the supernatant was precipitated for virus  
130 recovery using 15% PEG-6000 and 2% NaCl and gently shaken for 24 to 48 hours at 4°C [36].  
131 The viral precipitates were then pelleted at 8000 rpm for 40 minutes and the pellet was re-

132 suspended in 400 $\mu$ l of SM buffer (Tris/NaCl/MgSO<sub>4</sub>) for further processing (Fig 2). The samples  
133 were handled in enhanced Biosafety Level 2 laboratory with full personal protective equipment.

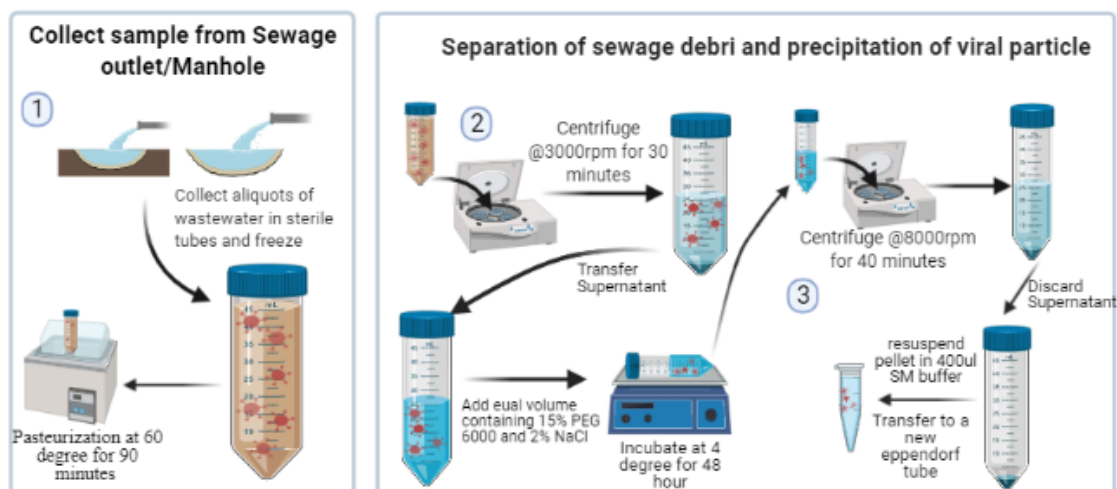

134 **Fig 2 Environmental (sewage) sample processing for viral RNA extraction-** 1) grab sewage  
135 samples collected, 2) differential centrifugation for virus isolation, 3) supernatant precipitation and  
136 virus recovery. This illustration was created using BioRender app [37].

### 137 **SARS-CoV-2 detection using RT-PCR assay- Primary screening**

138 We took samples from the sewage pipes of a selected hospital (Nepal Armed Police Hospital) with  
139 known admitted COVID-19 patients as a positive control site. Initially, regular diagnostic Real-  
140 Time polymerase chain reaction (PCR)-based assay (detecting envelope, nucleoprotein, and  
141 ORF1) was used to detect and quantify (sensitivity ~20 viral copies/ml) SARS-CoV-2.

142



143 We also used nested PCR-based assay (which detects all coronavirus, Fig 3) followed by meta-  
144 barcoding to increase the sensitivity significantly and confirm the presence of other circulating  
145 coronaviruses along with SARS-CoV-2.

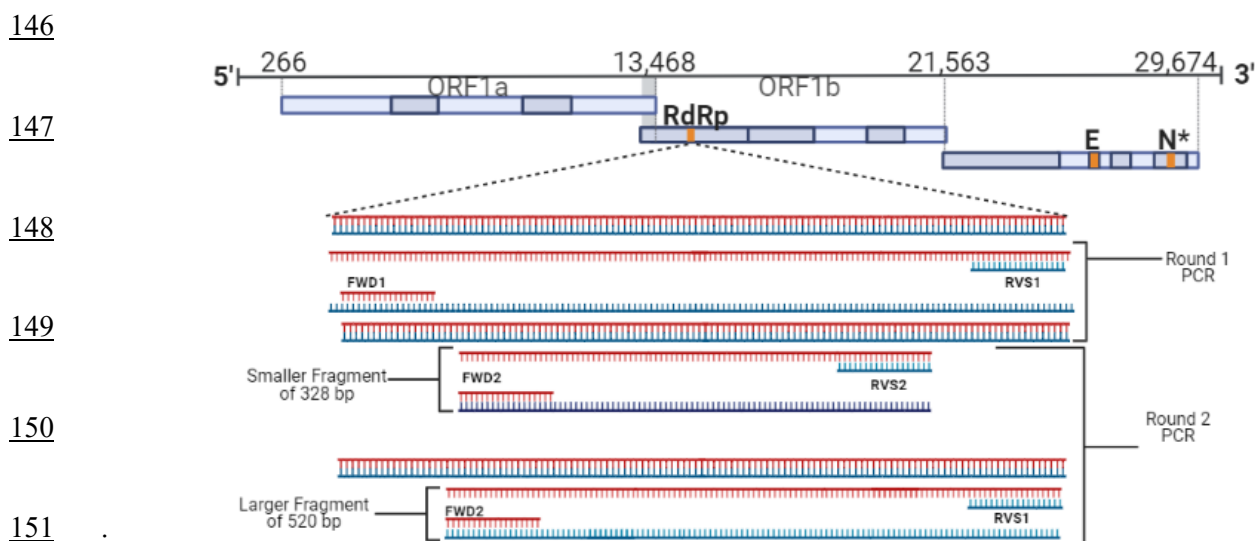

152

153 **Fig 3 Nested PCR to detect corona virus- using two sets of primers (FWD1/RVS2 &**  
154 **FWD2/RVS1) two PCR amplicons (328bp and 520bp) were produced which were cleaned**  
155 **and sequenced using Flongle MinION.** The obtained sequences were then BLAST analyzed in  
156 the NCBI database for viral taxonomic identification [38]. The images were created using  
157 BioRender app [37].

158 RNA was extracted from the viral suspension (200µl) (abGenix viral DNA and RNA Extraction  
159 Kit, AIT Biotech, Singapore) in an automated DNA and RNA extraction system (abGenixAIT  
160 Biotech, Singapore). SARS-CoV-2 was detected in sewage samples using Allplex™ RT-PCR  
161 SARS-CoV-2 Assay (Seegene Inc., Korea). The 5µl of extracted RNA was mixed with 10µl of  
162 qPCR mix consisting 2019-nCoV MOM (3µl), Real-time One-step Enzyme (1.2µl), 5X Real-time

163 One-step Buffer (3 $\mu$ l) and Nuclease free water (2.8 $\mu$ l) with manufacture recommended conditions-  
164 cDNA synthesis (50°C for 20 min); polymerase activation (95 °C for 15 min); PCR (45 cycles of  
165 denaturation at 94°C for 15 s, and annealing/extension at 58°C for 30 s). 2019-nCoV\_RdRp  
166 (ORF1ab) Positive Control (cat. 10006897, IDT USA) obtained from the University of California-  
167 Davis with known copy number was used to build a standard curve to determine the viral load of  
168 SARS-CoV-2. The viral load quantitation data of each site were visualized geospatially using the  
169 Heat-map plugin in QGIS v3.16 [32]. The viral load data were first converted to log scale, and  
170 then attributes were used to generate the heat-map, which was plotted against a base map obtained  
171 from open street maps.

## 172 **Coronavirus detection using meta-barcoding in MinION**

173 To detect the presence of coronavirus other than SARS-CoV-2, we further screened RT-PCR  
174 negative samples with corona viral family-specific nested PCR modified on Quan et al. protocol  
175 using primers sets (FWD1/RVS2 & FWD2/RVS1) and producing 328bp and 520bp PCR  
176 amplicons [39] (Fig 3). 8 $\mu$ l of RNA template was mixed with 1 $\mu$ l of random hexamers and 1  $\mu$ l of  
177 dNTPs and incubated at 65°C for 5 minutes. This mixture was combined with 10 $\mu$ l of synthesis  
178 mix consisting 10X RT (2 $\mu$ l), 25mM MgCl<sub>2</sub> (4  $\mu$ l), 0.1M DTT (2 $\mu$ l), RNase Out (1 $\mu$ l) and SSIII  
179 (1 $\mu$ l) (Superscript III (SSIII) cDNA synthesis kit, Invitrogen, USA). The final mixture was  
180 incubated at room temperature for 10 minutes, followed by incubation at 50°C for 50 minutes, and  
181 terminated at 85°C for 5 minutes. To remove any remnant RNA, the mixture was treated with 1 $\mu$ l  
182 of RNase H and incubated at 37°C for 20 minutes. The PCR amplicons were purified using a  
183 Montage Gel Purification kit (EMD Millipore Corp, USA) and sequenced using a portable next-  
184 generation sequencing device (Flongle MinION, Oxford Nanopore Technologies, UK). Nanoplots  
185 v1.30.1 [40] was used to check the quality of the raw nanopore fastq reads, and adapter sequences

186 were trimmed using Porechop v0.2.4 [41]. Length and quality filtering were performed using  
187 Filtlong v0.2.0 [42], with minimum length and q-score thresholds of 300bp and seven. The cleaned  
188 sequence reads were then de-novo assembled using Canu v2.0 [43] to generate contigs with an  
189 overlap parameter threshold of 100bp. The scaffolds generated were subjected to the Basic Local  
190 Alignment Search Tool (BLAST) [44] for taxonomic identification against locally downloaded  
191 GenBank database (Release 240, October 15 2020).

## 192 **Whole-genome sequencing of SARS-CoV-2 using MinION**

### 193 **Library preparation and sequencing using MinION**

194 Tiled amplicon sequencing was used to amplify the whole genome of SARS-CoV-2 using ARTIC  
195 PCR protocol [45]. This protocol has been widely adopted to sequence the entire genome of SARS-  
196 CoV-2 from clinical samples. With a set of 98 PCR primers, ARTIC PCR amplifies ~400bp  
197 amplicons spanning the SARS-CoV-2 genome with adjacent ~200bp overlaps. The sequencing  
198 library preparation is done by pooling these 98 primers in two pools and running two PCR  
199 reactions. We expect environmental samples to be highly degraded, and hence this protocol suits  
200 well for our study as smaller-sized amplicon increases the success of whole-genome amplification.

201 25µl reaction volume from each PCR pool were prepared containing 12.5µl Ampligold 360 2X  
202 MM, 3.6µl of primers and 2µl template cDNA. The PCR conditions were: 95°C for 30 secs  
203 followed by 45 cycles of 95°C for 15 secs, 63°C for 5 mins. The ARTIC PCR amplicons were  
204 further cleaned (AMPure bead, Agencourt, Beckman Coulter, USA) and quantified (Qubit 3,  
205 Invitrogen Thermofisher Scientific, USA). The PCR amplicons were pooled into a single tube at  
206 an equimolar concentration of 100fm. Native barcodes were assigned for each sample using Native  
207 barcoding Expansion kit (EXP-NBD104) and ligation sequencing kit (SQK-LSK109) and run in  
208 Flongle Flowcell using MinION (Oxford Nanopore, UK). Up to 14 samples were multiplexed in  
209 three FLO-FLG001 Flongle flow cells (R9.4.1) and sequenced on MinION Mk1B device in three  
210 different sequencing runs.

211

## 212 **Bioinformatics workflow for consensus genome sequence generation**

213 MinKNOW software (Oxford Nanopore, UK) was used to monitor sequencing run, collect the raw  
214 data, and perform real-time base calling. The RAMPART v1.2.0 [46] software package developed  
215 by the ARTIC network was used to visualize read mapping and genome coverage in real-time for  
216 each barcode.

217 Data analysis was done using the ARTIC pipeline v1.1.3 [47] of the ARTIC network's nanopore  
218 bioinformatics protocol [48]. Base-calling was performed in real-time by Guppy v4.4.0 (Oxford  
219 Nanopore, UK) integrated within MinKNOW v20.10.3 (Oxford Nanopore, UK) using high-  
220 accuracy base calling mode in Thinkpad P72 Mobile Workstation (Lenovo, USA), which  
221 generated fast5 and fastq reads.

222 De-multiplexing was performed by Guppy using strict parameters requiring barcodes (indexes) at  
223 both ends of the reads and quality filtering (qscore threshold 7) was performed within MinKNOW  
224 platform. This generated pass and fail reads for each barcode in individual directories.

225 Further filtering of read length was performed using the ARTIC pipeline with *guppyplex* option  
226 considering parameters of certain threshold length only (range 400 bp -700 bp) that removed  
227 obvious chimeric reads.

228 The processed reads were subjected to mapping, aligning, variant and consensus calling using the  
229 ARTIC pipeline with the *minion* option. The reads were mapped against the SARS-CoV-2  
230 reference (NC\_045512/MN908947) using the Minimap2 v2.17 [49]. The aligned read files were  
231 sorted using SAMtools v1.11 [50] to obtain coverage data and a consensus sequence.

232

## 233 **Whole-genome sequencing of SARS-CoV-2 using MiSeq**

234 Using identical ARTIC amplicons, the first two positive samples from the study were sequenced  
235 in MiSeq (Illumina, USA) platform. The amplicons were cleaned (AMPure bead, Agencourt,  
236 Beckman Coulter, USA), and a library was prepared using the Nextera XT library preparation kit  
237 [24]. The data was processed and a consensus sequence was generated using a nextflow-based  
238 SARS-CoV-2 Consensus Genome Pipeline developed by Chan Zuckerberg Biohub [51].

## 239 **Geo-spatial mapping of identified variants of SARS-CoV-2**

240 Identification of known and novel mutations in the obtained whole-genome sequences of SARS-  
241 CoV-2 was performed using a CoV-GLUE web application-based bioinformatics tool [52]. This  
242 tool is based on a GLUE data-centric bioinformatics environment that analyzes nucleotide  
243 variations in user-submitted sequences of SARS-CoV-2, enabled by data from EpiCoV of GISAID  
244 database. The tool compares and analyses the sequences against the reference sequence of SARS-  
245 CoV-2 and generates lists of amino acid replacements and coding region indels. The mutation table  
246 data obtained from CoVGlue was formatted to contain column names as follows; "sample",  
247 "gene", "variant\_class", "amino.acid.change". Once the data has been formatted, it was imported  
248 to R studio and were processed using plugin GenVisR to generate mutation landscape plot  
249 (Waterfall plot) [53].

250 The tool also provides a lineage based on Pangolin classification of SARS-CoV-2 clades and its  
251 LWR (likelihood weight ratio) score, which approximates confidence level of clade assignments  
252 based on quality of the submitted sequence. The distribution of lineages across the sampling sites  
253 were visualized in a map using QGIS v3.16 [32] against a base-map obtained from the Open Street  
254 map [33].



## 255    **Results**

### 256    **Optimization of protocol for the detection of SARS-CoV-2 and other** 257    **coronaviruses in sewage samples**

258    Four preliminary sites were selected (Armed Police Force Hospital (APFH), Thapathali (TH1),  
259    Shankhamul (TH2) and Teku (Te3)) for the initial protocol development and optimization. Along  
260    with SARS-CoV-2, we also detected other coronaviruses, including Human coronavirus 229E,  
261    Duck-dominant coronavirus, Dromedary camel coronavirus HKU223, and Rat coronavirus, in two  
262    preliminary sites (TH1 and Te3) (S1 Table).

### 263    **Whole-genome sequencing of SARS-CoV-2 using MinION and** 264    **MiSeq**

265    Whole-genome sequencing data of detected SARS-CoV-2 were obtained using MinION and  
266    MiSeq from two different sites (TH1 and Te3). The result showed a slight difference in genome  
267    coverage and contigs recovered from both the platforms. We observed slightly higher genome  
268    fraction coverage on MiSeq than on MinION. In one of the samples (TH1), MiSeq produced  
269    relatively high (47.2%) genome fragment sequences compared to MinION (32.2%). A similar  
270    result was observed in the other sample (Te3), with MiSeq producing around 42.9% sequences  
271    compared to 31.1% from MinION (Table 1).

272

273 **Table 1 MinION sequencing run details and run statistics**

|                             | <b>First Run</b> | <b>Second Run</b> | <b>Third Run</b> |
|-----------------------------|------------------|-------------------|------------------|
| Number of samples           | 2                | 6                 | 6                |
| Total raw reads             | 693,554          | 312,602           | 128,107          |
| Total mapped reads          | 414,002          | 253,168           | 102,011          |
| Median reads length         | 482              | 494               | 477              |
| Passed reads                | 433,024          | 258,256           | 104,856          |
| Genome fraction (%) at >20x | 33 to 36         | 32.3 to 51.9      | 28.2 to 71.8     |
| Run duration hours          | 23.55            | 18.47             | 14.89            |

274 CoVGlue analyses [52] of consensus genomic sequences from both the sequencing platforms  
275 indicated the presence of the same Pangolin lineage (**B.1**). Major mutations were plotted to  
276 visualize and differentiate key differences between MiSeq and MinION using the GenVisR tool in  
277 R studio Version 1.4.1103. We detected **D614G** which is the defining mutation of the G clade  
278 [54]. MiSeq did detect more mutations than MinION (Fig 4). This finding can be due to greater  
279 sequencing depth (1 million reads) obtained in MiSeq than in MinION using Flongle (378,000

reads). Despite shallow sequencing depth in MinION, both platforms successfully detected major mutations and provided adequate sequencing coverage data for lineage identification [55].

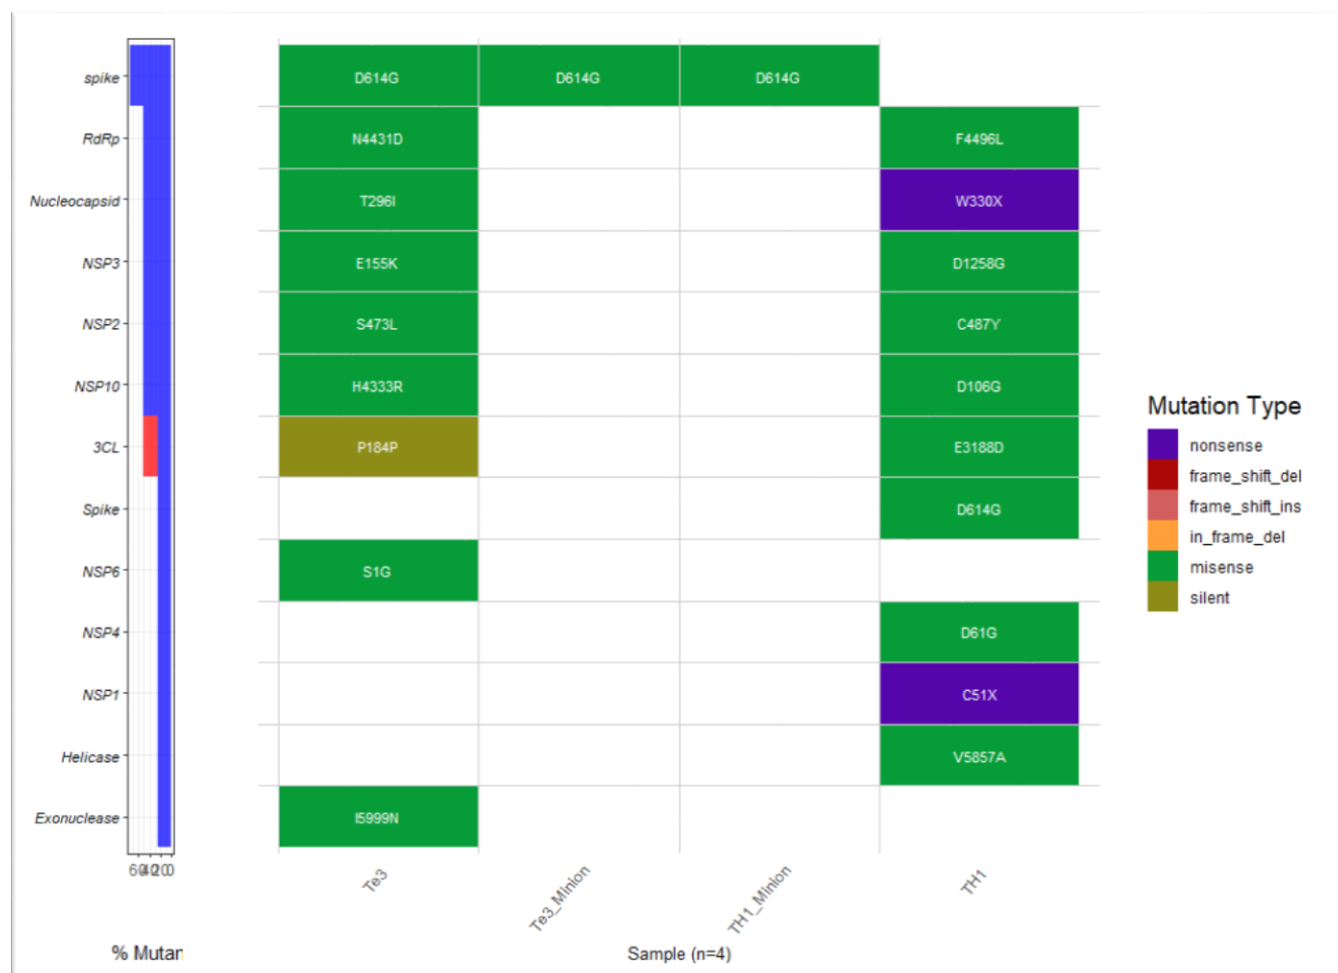

**Fig 4 Detected mutations in the environmental samples using MinION and MiSeq.** In this waterfall plot, rows represent genes with key detected mutations with the columns' corresponding samples. Based on the weight of mutation type (orderly displayed in the legend with **nonsense** having greater impact and **silent** having the least impact on gene expression), only major mutations in a particular gene in each sample are displayed. Samples from two sites (TH1 and Te3) were sequenced using MiSeq (TH1 and Te3), and MinION (TH1\_Minion and Te3\_Minion) (Waterfall plot created using CovGlue and GenVisR [56] on R studio version 1.4.110).

289

290 **SARS-CoV-2 genomic-based environmental surveillance with sewage**

291 **samples**

292 Out of 20 sites, sewage samples from the 16 sites had detectable SARS-CoV-2 (S2 Table). A heat-  
293 map of all these 16 SARS-CoV-2 positive sites was created based on viral load intensity and  
294 corresponding geospatial data. With a relatively large number of sampling points, dense  
295 populations and detected viral load (295 copies/ml), Ward 11 (est. pop=4632) is colored dark in  
296 the heat- map. Although Ward 17 (est. pop=9500 people) had the most intense viral load (242,000  
297 copies/ml), the sampling points do not cover the entire area, and hence lightly colored in the heat-  
298 map than Ward 11. In Ward 9 (est. pop= 2791 people), we did not detect SARS-CoV-2 (Fig 5).

299

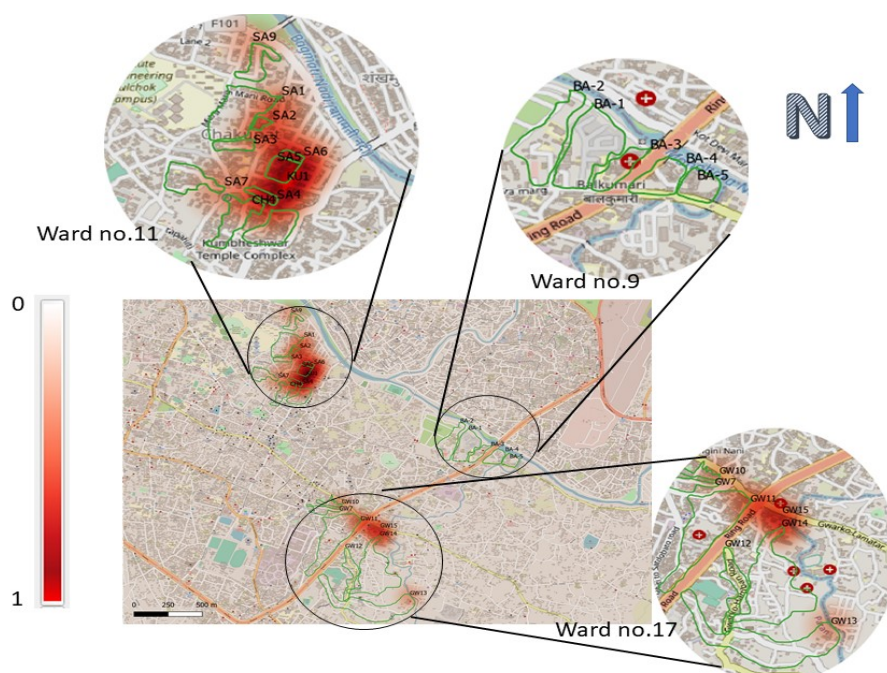

300

301 **Fig 5 SARS-CoV-2 heat-map based on viral load intensity from sites with detectable virus.**

302 Heat-map of three sampled wards (11, 9 and 17) of the Lalitpur Municipality (Kathmandu valley)

303 with SARS-CoV-2 presence and its viral load intensity in sewage samples. The map was created  
304 using QGIS v3.16 [32] with base-map from the Open Street Map [33].

### 305 **Whole-genome sequencing of SARS-CoV-2 on MinION**

306 Only samples from 14 sites (GW11, SA2, SA7, CH4, KU1, SA5, GW10, GW13, GW14, SA6,  
307 SA4, SA9, GW12 and GW15) yielded PCR amplicons using ARTIC primers, of which only 12  
308 samples (GW11, SA2, SA7, CH4, KU1, SA5, GW14, SA6, SA4, SA9, GW12 and GW15) had  
309 enough quantifiable PCR products (S3 Table, S4 Table) and were tagged with Native Barcode  
310 from NBD01 to NBD012 [24]. The consensus genomic sequences of SARS-CoV-2 have been  
311 submitted to National Center for Biotechnology Information (NCBI) GenBank (accession no.  
312 MW739929-MW739930). MinION sequencing was performed with 6 samples at a time, and run  
313 data is shown in Table 1.

314 All of the consensus sequences obtained from MinION were compared against the reference  
315 sequence (accession no. MN908947.3) using the CovGlue web application. **B.1** (16.7%), **B.1.36**  
316 (33.3%) and **B.1.1** (50.0%) were identified as circulating lineages of SARS-CoV-2 in the  
317 environmental (sewage) samples (Fig 6).

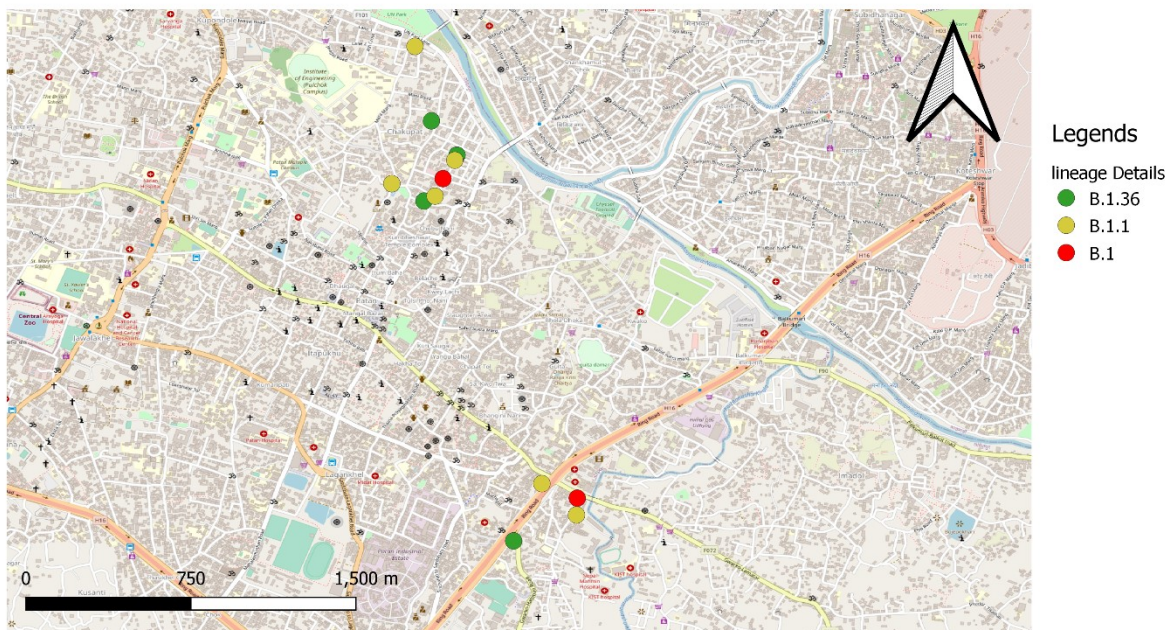

318

319 **Fig 6 Geographic distribution of the detected SARS-CoV-2 Pangolin lineages [56] in the**  
320 **environmental samples from CovGlue submission. Three wards of Lalitpur Municipality**  
321 **(Kathmandu valley) with a distribution of detected SARS-CoV-2 and its lineages in sewage**  
322 **samples (Created using QGis 3.16 using Open Street Map [33]).**

### 323 **SARS-CoV-2 evolution trend**

324 Transition-Transversion mutation summary was visualized with a waterfall plot and created with  
325 GenVisR [55] (Fig 7). Nucleotide mutation summary of all the samples showed a greater frequency  
326 of transition (G>A (G>U) or C>T) in most of the samples, followed by transversion (G>T or C>A  
327 (C>U). Overall transition seems to have occurred in greater frequency than transversion  
328 (transition=57.5%, transversion=42.4%); and A>C or T> G transversion is rarely detected (16.4%)  
329 (Fig 8). A higher number of transitions in detected mutations indicate a rapid evolution of SARS-  
330 CoV-2 in the host [57].



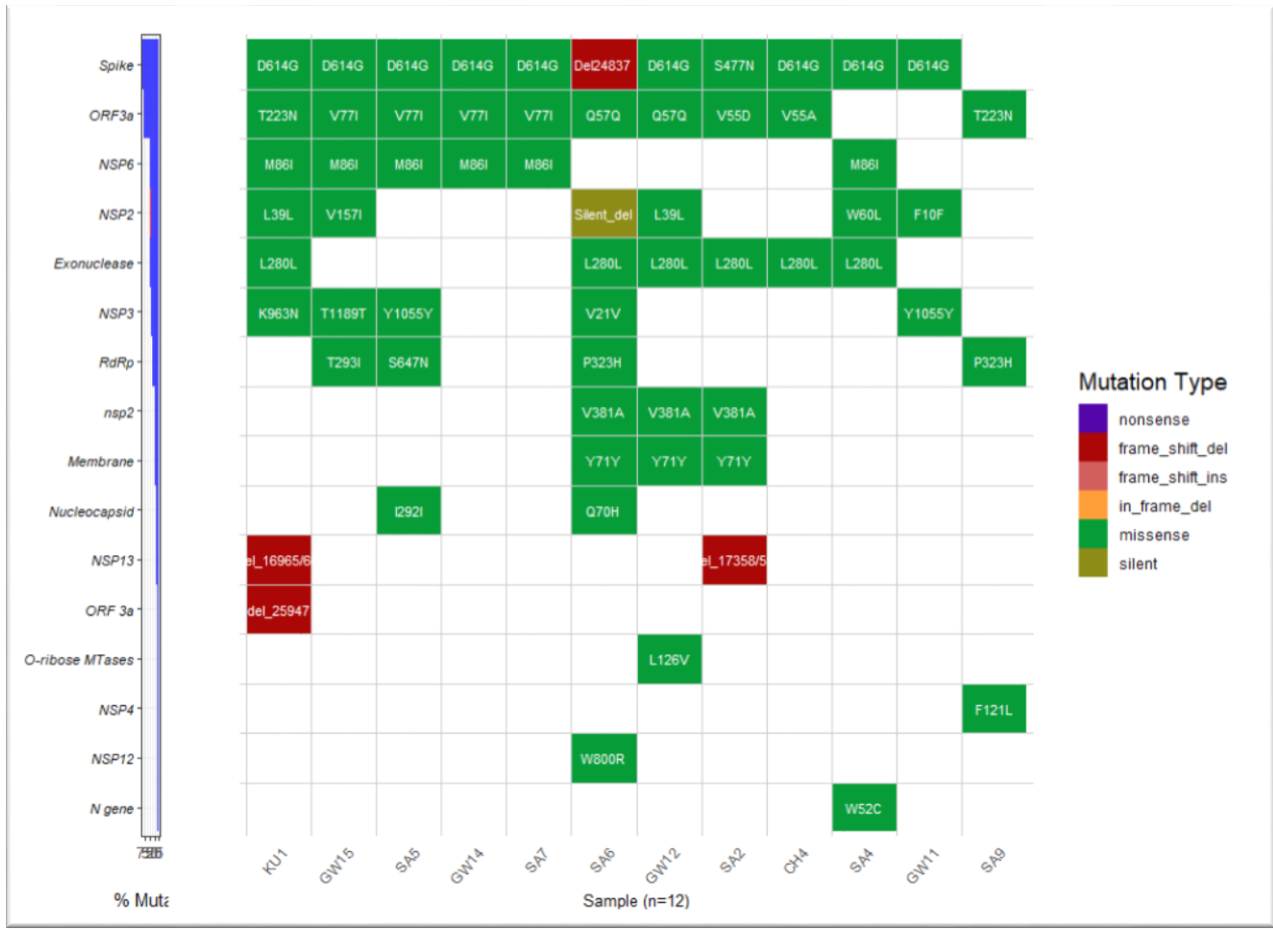

331

332 **Fig 7 Detected SARS-CoV-2 genes and their associated mutations.** Rows represents genes with

333 major mutations detected while column represents sample, a waterfall plot was created based upon

334 the weight of mutation type with nonsense having greater impact and silent having the least impact  
335 on gene expression. Created using CovGlue and GenVisR [56] on R studio version 1.4.110.

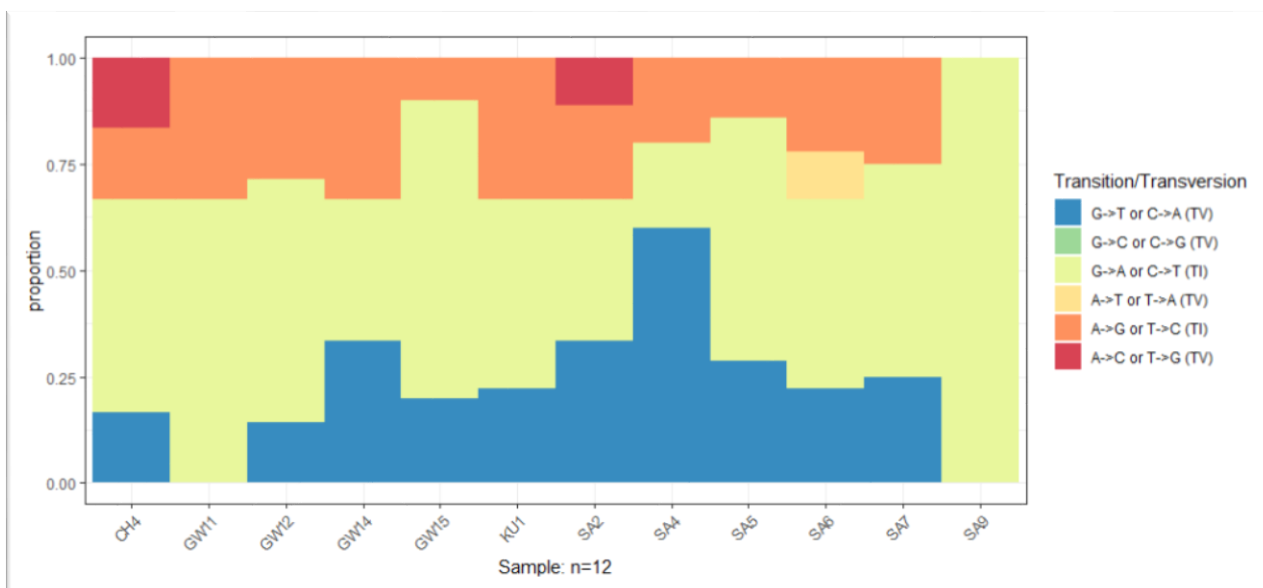

336  
337 **Fig 8 Transition-Transversion mutation summary plot** from the mutation table detected by  
338 CovGlue using GenVisR [55] on R studio version 1.4.1103, showing various genes with detected  
339 mutations.

340 A total of 41 distinct mutations were detected across the SARS-CoV-2 genome with nine novel  
341 mutations - six due to deletion. Of all the deletions detected, two were non-codon aligning  
342 deletions, whereas the rest were frameshift deletion, including one in the spike gene (Fig 7, Fig 9).  
343 Major mutations were detected in spike, ORF3a, NSP6, and Exonuclease genes of SARS-CoV-2.  
344 **D614G** and **S477N** mutations were detected in the spike gene. Other genes with frameshift deletion  
345 include **NSP13** and **ORF3a** gene and one silent deletion on the **NSP2** gene (Fig 7, Fig 9).

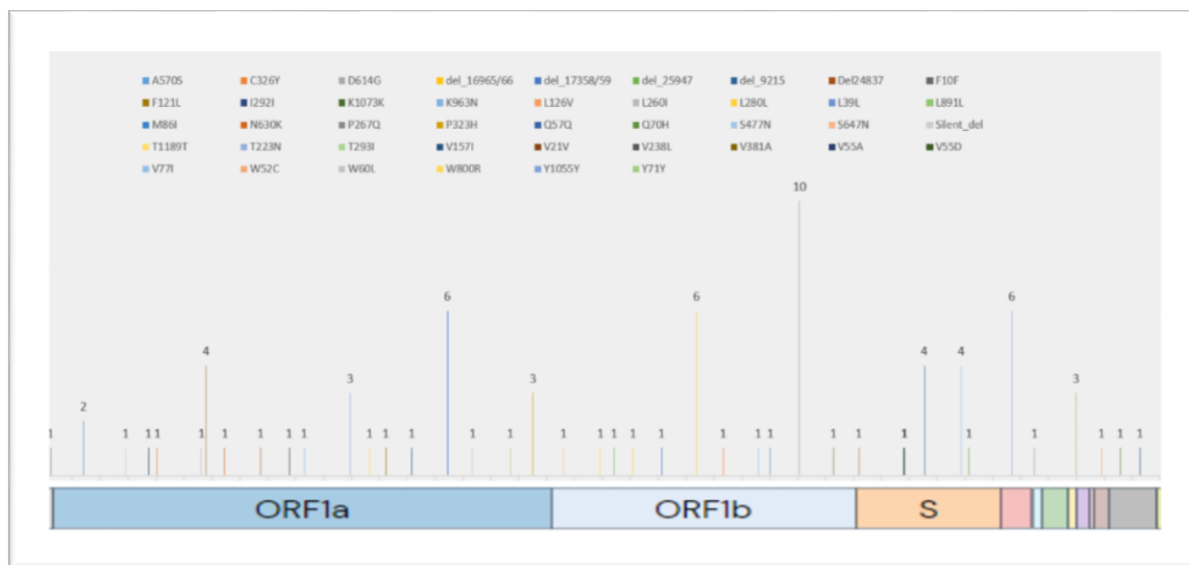

346

347 **Fig 9 Detected mutations and their frequencies in the SARS-CoV-2 genome from**  
 348 **environmental samples (n=12).** The frequency of detected mutations on the corresponding genes  
 349 is labeled at the top of the chart with height representing the frequency level. The labels on the X-  
 350 axis were extracted from GISAID[58].

351 The novel mutations with amino acid changes were detected on the **W800R**, **W60L** and **W52C** in  
 352 **NSP12**, **NSP2** and **N** genes. Among these three detected mutations, two were from the same  
 353 sample (**SA4**), and one was from **SA6** collected from different sampling sites from the same ward.

354

## 355    **Discussion**

356    As demonstrated by its successful application in the global efforts to eradicate poliovirus [24], ES  
357    can be an important supplement to clinical surveillance. In particular, ES can contribute to several  
358    critical areas, such as characterizing regional diversity in areas without clinical surveillance,  
359    mapping geographic micro-diversity to inform risk-based interventions, early detection of  
360    outbreaks before clinical presentation, and advancing real-time assessment of interventions to  
361    inform need for additional public health measures [24]. Compared to clinical surveillance, ES can  
362    be inexpensive and fast, but this approach has yet to be fully validated as a viable option for  
363    estimating disease burden in a field setting.

364    Rapid detection of SARS-CoV-2 in environmental samples (such as sewage) and viral strain  
365    characterization using portable genomic tools provide important information on disease  
366    distribution at a community level [24]. Such data can help identify transmission hotspots in urban  
367    and rural communities and provide information on circulating strains of viruses, an essential  
368    consideration for vaccination programs. We have optimized a system of detecting the virus from  
369    sewage samples, and based on viral load, we have constructed a heat-map of SARS-CoV-2 in the  
370    selected areas of the Kathmandu valley. In resource-limited, developing countries like Nepal,  
371    access to tools and technologies required to perform genomic-based detection and surveillance can  
372    be limited. This feasibility study has demonstrated that ES based on sewage samples using highly  
373    sensitive nested PCR combined with portable next-generation sequencing technology can provide  
374    adequate sensitivity, specificity, and sequencing depth to detect, quantify, and characterize SARS-  
375    CoV-2 accurately.

376 Whole-genome sequencing of the SARS-CoV-2 was obtained using ARTIC primers in two  
377 popularly used next-generation sequencing platforms (MiSeq (Illumina, USA) and MinION  
378 (Oxford Nanopore, UK)). One of our main objectives was to explore the feasibility of using a  
379 portable sequencing platform in Nepal. Using the same protocol, the sequencing data obtained  
380 from both these platforms were analyzed, and the results obtained were almost identical,  
381 demonstrating the suitability of using portable sequencing devices such as MinION to characterize  
382 viral (SARS-CoV-2) strains. However, with CoVGlue analysis, we were able to detect more  
383 variants (mutations) in Illumina MiSeq than ONT MinION using Flongle flowcell. We can use  
384 Flongle (MinION) for screening for rapid surveillance, and further detailed analysis can be done  
385 either on MiSeq or SpotON Flowcell (MinION).

386 In our ES samples, we were also able to detect other coronaviruses such as human coronavirus  
387 229E, a known cause of the common cold with global distribution [24,59]. The presence of duck  
388 dominant coronavirus and rodent coronavirus in sewage suggests an abundant mixture of various  
389 coronaviruses originating from other species. A diversity of coronaviruses in sewage samples  
390 highlights the potential for emerging coronaviruses among species in close proximity in the urban  
391 setting, especially given the propensity for coronaviruses to recombine [60].

392 Out of 20 different sampled sites, 16 had SARS-CoV-2 present. The heat-map generated based on  
393 the intensity of viral load correlated well with the catchment area and population size (Fig 5).  
394 Analyzing enough sampling points can provide a good picture of circulating viruses in a  
395 community. Further studies can be designed to look into incidence estimation in communities and  
396 correlate that with available clinical data.

397 The obtained consensus genome sequences of SARS-CoV-2 from the sewage samples identified  
398 **B.1**, **B.1.36** and **B.1.1** as circulating lineage. The lineage **B.1** was a strain circulating in the United  
399 States of America (46.0%), United Kingdom (13.0%), Canada (5.0%), Spain (4.0%), and France  
400 (4.0%); and was involved in the Italian outbreak [24,61]. **B.1.1** was also widely circulating around  
401 the globe (United States of America (27.0%), United Kingdom (22.0%), Canada (6.0%), Germany  
402 (6.0%), and Netherlands (5.0%)) and is cited as a European lineage [61]. Lineage **B.1.36** was the  
403 predominant strain circulating in the United States of America (94.0%), and is known as a USA  
404 lineage[61]. Whole-genome data of SARS-CoV-2 from 14 clinical samples have been sequenced  
405 at our facility for the Nepal Health Research Council (Government of Nepal). Data are publicly  
406 available in the GISAID database [24]. Among these, three samples originate from the Kathmandu  
407 valley, and identified lineages include **B.1.36** and **B.1.130**. The detected SARS-CoV-2 lineages  
408 (**B.1**, **B.1.1**, **B.1.36**) and key mutations such as **D614G** in the clinical samples were also circulating  
409 in the sewage samples.

410 Among the detected mutations, the majority were transitions that provide a snapshot of the  
411 evolutionary dynamics of SARS-CoV-2 in the host. Few novel mutations with possible clinical  
412 significance were also detected- such as frameshift and silent deletion mutations in **S**, **NSP13**,  
413 **ORF3a**, and **NSP2** genes. These novel mutations are yet to be reported in the global database, and  
414 their functional characterizations are further required. For example, frameshift deletion in the **S**  
415 gene could have important significance in clinical and epidemiological frames. The D614G (in **S**  
416 gene) was spontaneously detected in almost every sample, a defining mutation for the G clade  
417 [54]. This particular mutation is associated with increased infectivity of SARS-CoV-2 [23].  
418 Another detected mutation, S477N (in **S** gene), has been reported to increase the binding affinity  
419 of the virus to the host's angiotensin-converting enzyme 2 (ACE-2) receptor giving higher



420 transmission capability [62,63]. Similarly, novel missense mutations detected in **NSP12**, **NSP2**,  
421 and **N** genes from sites in the same Ward indicated ongoing viral circulation in the community.  
422 These inferences tell us that the virus is spreading rapidly throughout the community, which  
423 provides the virus opportunities for rapid evolution. Such a scenario creates an environment for  
424 the emergence of new variants, which was also the reason behind the origins of emerging variants  
425 in the UK (B.1.1.7), South Africa (B.1.351), and South America (P.1) [64]. This finding also  
426 highlights the mandates for genomic surveillance to track viral evolution and emerging variants.

427 Three major vaccines (Pfizer-BioNTech, Moderna, and Oxford-AstraZeneca) approved by the  
428 WHO target spike protein to produce neutralizing antibodies against SARS-CoV-2 [65]. The  
429 detection of circulating viral variants through genomic surveillance has become more critical than  
430 ever to evaluate the efficacy of the vaccine against the evolving virus. For this reason, genomic  
431 surveillance is gradually being conducted in many developed countries, with the United Kingdom  
432 contributing actively to the global genomic database of SARS-CoV-2 [66]. However, developing  
433 countries are still struggling to understand COVID-19 incidences and transmission due to a lack  
434 of genomic laboratory capabilities. Genomic surveillance in environmental samples could be a  
435 possible solution for resource-strapped countries to identify and estimate SARS-CoV-2 presence  
436 at a community level and determine the circulating strains of the virus, which could be used to  
437 select the most appropriate vaccine.

438

## 439    **Acknowledgments**

440    We would like to thank the Mayor’s Office of the Lalitpur Metropolitan City for providing us with  
441    permit and encouraging us to conduct this research. We would like to thank Professor Eric Alm  
442    and Dr. Noriko Endo of BIOBOT (USA) for providing composite sampling robots. We would also  
443    like to express our gratitude to the One Health Institute of the University of California-Davis and  
444    the USAID-funded PREDICT project for providing us with laboratory resources. Whole-genome  
445    sequencing was done at the Intrepid Nepal Genomic Center- some of our work was partially funded  
446    by the Australian Development Agency and PSI grant (the Netherlands). We would like to thank  
447    all these agencies for their support. And finally, we would like to thank everyone at Intrepid Nepal  
448    Pvt Ltd, Center for Molecular Dynamics Nepal and BIOVAC Nepal for their tireless work, even  
449    during nationally enforced lockdown in Nepal.

450 **Figure Captions**

451 **Fig 1 Map of the sampling sites and respective catchment areas selected for the SARS-CoV-**  
452 **2 environmental surveillance in the Kathmandu valley.** The sites were visualized in a map  
453 using QGIS v3.16 [32] against a base map obtained from the Open Street Map [33].

454 **Fig 2 Environmental (sewage) sample processing for viral RNA extraction-** 1) grab sewage  
455 samples collected, 2) differential centrifugation for virus isolation, 3) supernatant precipitation and  
456 virus recovery. This illustration was created using BioRender app [37].

457 **Fig 3 Nested PCR to detect corona virus- using two sets of primers (FWD1/RVS2 &**  
458 **FWD2/RVS1) two PCR amplicons (328bp and 520bp) were produced which were cleaned**  
459 **and sequenced using Flongle MinION.** The obtained sequences were then BLAST analyzed in  
460 the NCBI database for viral taxonomic identification [38]. The images were created using  
461 BioRender app [37].

462 **Fig 4 Detected mutations in the environmental samples using MinION and MiSeq.** In this  
463 waterfall plot, rows represent genes with key detected mutations with the columns' corresponding  
464 samples. Based on the weight of mutation type (orderly displayed in the legend with **nonsense**  
465 having greater impact and **silent** having the least impact on gene expression), only major mutations  
466 in a particular gene in each sample are displayed. Samples from two sites (TH1 and Te3) were  
467 sequenced using MiSeq (TH1 and Te3), and MinION (TH1\_Minion and Te3\_Minion) (Waterfall  
468 plot created using CovGlue and GenVisR [56] on R studio version 1.4.110).

469 **Fig 5 SARS-CoV-2 heat-map based on viral load intensity from sites with detectable virus.**  
470 Heat-map of three sampled wards (11, 9 and 17) of the Lalitpur Municipality (Kathmandu valley)

471 with SARS-CoV-2 presence and its viral load intensity in sewage samples. The map was created  
472 using QGIS v3.16 [32] with base-map from the Open Street Map [33].

473 **Fig 6 Geographic distribution of the detected SARS-CoV-2 Pangolin lineages [56] in the**  
474 **environmental samples from CovGlue submission.** Three wards of Lalitpur Municipality  
475 (Kathmandu valley) with a distribution of detected SARS-CoV-2 and its lineages in sewage  
476 samples (Created using QGIS 3.16 using Open Street Map [33]).

477 **Fig 7 Detected SARS-CoV-2 genes and their associated mutations.** Rows represents genes with  
478 major mutations detected while column represents sample, a waterfall plot was created based upon  
479 the weight of mutation type with nonsense having greater impact and silent having the least impact  
480 on gene expression. Created using CovGlue and GenVisR [56] on R studio version 1.4.110.

481 **Fig 8 Transition-Transversion mutation summary plot** from the mutation table detected by  
482 CovGlue using GenVisR [55] on R studio version 1.4.1103, showing various genes with detected  
483 mutations.

484 **Fig 9 Detected mutations and their frequencies in the SARS-CoV-2 genome from**  
485 **environmental samples (n=12).** The frequency of detected mutations on the corresponding genes  
486 is labeled at the top of the chart with height representing the frequency level.

487

488

489

490 **Table Caption**

491 **Table 1 MinION sequencing run details and run statistics**

492 **Supporting Information Captions**

493 **S1 Table: Blast result analysis of Coronavirus origin from sewage samples of Pilot phase**  
494 **study**

495 **S2 Table: Real time PCR data, viral load and population distribution of different sites.**  
496 **Amplified genes- envelope (E), internal control (house-keeping gene, IC), RdRp and**  
497 **nucleoplasmid (N) genes.**

498 **S3 Table: AMPure bead clean up and DNA quantification data of pool1 & pool2 artic PCR**  
499 **products in positive sewage samples before Indexing (Pilot study)**

500 **S4 Table: AMPure bead clean up and DNA quantification data of pool1 & pool2 ARTIC**  
501 **PCR products in positive sewage samples before indexing**

502

503

504    **Data Availability Statement:** The data used to support the findings of this study are included  
505    within the article. Accession numbers mentioned in this study are- MW739929 & MW739930.

506    **Funding:** This research project was funded by BIOVAC Nepal and Intrepid Nepal Pvt. Limited.  
507    With partial funding support from the PREDICT project, Australian Development Agency and PSI  
508    grant from the Government of the Netherlands.

509    **Competing interests:** The authors have declared that no competing interests exist.

510



## 511    **References**

- 512    1.    Hourdel V, Kwasiborski A, Balière C, Matheus S, Batéjat CF, Manuguerra J-C, et al. Rapid Genomic  
513       Characterization of SARS-CoV-2 by Direct Amplicon-Based Sequencing Through Comparison of  
514       MinION and Illumina iSeq100TM System. *Frontiers in microbiology*. 2020.
- 515    2.    Venugopal A, Ganesan H, Raja SSS, Govindasamy V, Arunachalam M, Narayanasamy A, et al. Novel  
516       Wastewater Surveillance Strategy for Early Detection of COVID-19 Hotspots. *Current Opinion in*  
517       *Environmental Science & Health*. 2020.
- 518    3.    Medema G, Heijnen L, Elsinga G, Italiaander R, Brouwer A. Presence of SARS-Coronavirus-2 in  
519       sewage. *MedRxiv*. 2020.
- 520    4.    COVID-19 Data Repository by the Center for Systems Science and Engineering (CSSE) at Johns  
521       Hopkins University. In: GitHub [Internet]. [cited 31 Jan 2021]. Available:  
522       <https://github.com/CSSEGISandData/COVID-19>
- 523    5.    -44\_weekly-who-nepal-situation-updates.pdf. Available: [https://cdn.who.int/media/docs/default-](https://cdn.who.int/media/docs/default-source/nepal-documents/novel-coronavirus/who-nepal-sitrep/-44_weekly-who-nepal-situation-updates.pdf?sfvrsn=f2d844f4_13)  
524       [source/nepal-documents/novel-coronavirus/who-nepal-sitrep/-44\\_weekly-who-nepal-situation-](https://cdn.who.int/media/docs/default-source/nepal-documents/novel-coronavirus/who-nepal-sitrep/-44_weekly-who-nepal-situation-updates.pdf?sfvrsn=f2d844f4_13)  
525       [updates.pdf?sfvrsn=f2d844f4\\_13](https://cdn.who.int/media/docs/default-source/nepal-documents/novel-coronavirus/who-nepal-sitrep/-44_weekly-who-nepal-situation-updates.pdf?sfvrsn=f2d844f4_13)
- 526    6.    Bolia R, Ranjan R, Bhat NK. Recognising the Gastrointestinal Manifestation of Pediatric Coronavirus  
527       Disease 2019. *The Indian Journal of Pediatrics*. 2020. pp. 1–2.
- 528    7.    Gao QY, Chen YX, Fang JY. 2019 novel coronavirus infection and gastrointestinal tract. *Journal of*  
529       *digestive diseases*. 2020. pp. 125–126.
- 530    8.    Nobel YR, Phipps M, Zucker J, Lebwohl B, Wang TC, Sobieszczyk ME, et al. Gastrointestinal  
531       symptoms and coronavirus disease 2019: a case-control study from the United States.  
532       *Gastroenterology*. 2020. pp. 373-375. e2.
- 533    9.    Papa A, Covino M, Pizzolante F, Miele L, Lopetuso L, Bove V, et al. Gastrointestinal symptoms and  
534       digestive comorbidities in an Italian cohort of patients with COVID-19. *European review for medical*  
535       *and pharmacological sciences*. 2020. pp. 7506–7511.
- 536    10.    Wang X-W, Li J-S, Guo T-K, Zhen B, Kong Q-X, Yi B, et al. Concentration and detection of SARS  
537       coronavirus in sewage from Xiao Tang Shan Hospital and the 309th Hospital. *Journal of virological*  
538       *methods*. 2005. pp. 156–161.
- 539    11.    Yam W, Chan K, Poon L, Guan Y, Yuen K, Seto W, et al. Evaluation of reverse transcription-PCR  
540       assays for rapid diagnosis of severe acute respiratory syndrome associated with a novel coronavirus.  
541       *Journal of clinical microbiology*. 2003. pp. 4521–4524.
- 542    12.    Yeo C, Kaushal S, Yeo D. Enteric involvement of coronaviruses: is faecal–oral transmission of  
543       SARS-CoV-2 possible? *The lancet Gastroenterology & hepatology*. 2020;5: 335–337.
- 544    13.    Zhang J, Wang S, Xue Y. Fecal specimen diagnosis 2019 novel coronavirus–infected pneumonia.  
545       *Journal of medical virology*. 2020. pp. 680–682.

- 546 14. Wang X-W, Li J-S, Jin M, Zhen B, Kong Q-X, Song N, et al. Study on the resistance of severe acute  
547 respiratory syndrome-associated coronavirus. *Journal of virological methods*. 2005. pp. 171–177.
- 548 15. Ye Y, Ellenberg RM, Graham KE, Wigginton KR. Survivability, partitioning, and recovery of  
549 enveloped viruses in untreated municipal wastewater. *Environmental science & technology*. 2016.  
550 pp. 5077–5085.
- 551 16. Wu F, Xiao A, Zhang J, Gu X, Lee WL, Kauffman K, et al. SARS-CoV-2 titers in wastewater are  
552 higher than expected from clinically confirmed cases. *medRxiv*. 2020.
- 553 17. Hata A, Honda R. Potential Sensitivity of Wastewater Monitoring for SARS-CoV-2: Comparison  
554 with Norovirus Cases. *Environmental Science & Technology*. 2020.
- 555 18. Ibrahim NK. Epidemiologic surveillance for controlling Covid-19 pandemic: types, challenges and  
556 implications. *Journal of Infection and Public Health*. 2020;13: 1630–1638.  
557 doi:10.1016/j.jiph.2020.07.019
- 558 19. Medema G, Been F, Heijnen L, Petterson S. Implementation of environmental surveillance for SARS-  
559 CoV-2 virus to support public health decisions: Opportunities and challenges. *Current Opinion in*  
560 *Environmental Science & Health*. 2020.
- 561 20. Bibby K, Peccia J. Identification of viral pathogen diversity in sewage sludge by metagenome  
562 analysis. *Environmental science & technology*. 2013. pp. 1945–1951.
- 563 21. Gundy PM, Gerba CP, Pepper IL. Survival of coronaviruses in water and wastewater. *Food and*  
564 *Environmental Virology*. 2009. p. 10.
- 565 22. Lago PM, Gary Jr HE, Pérez LS, Cáceres V, Olivera JB, Puentes RP, et al. Poliovirus detection in  
566 wastewater and stools following an immunization campaign in Havana, Cuba. *International journal*  
567 *of epidemiology*. 2003. pp. 772–777.
- 568 23. Plante JA, Liu Y, Liu J, Xia H, Johnson BA, Lokugamage KG, et al. Spike mutation D614G alters  
569 SARS-CoV-2 fitness. *Nature*. 2020; 1–6.
- 570 24. Quick J, Grubaugh ND, Pullan ST, Claro IM, Smith AD, Gangavarapu K, et al. Multiplex PCR  
571 method for MinION and Illumina sequencing of Zika and other virus genomes directly from clinical  
572 samples. *Nat Protoc*. 2017;12: 1261–1276. doi:10.1038/nprot.2017.066
- 573 25. Hoenen T, Groseth A, Rosenke K, Fischer RJ, Hoenen A, Judson SD, et al. Nanopore sequencing as  
574 a rapidly deployable Ebola outbreak tool. *Emerging infectious diseases*. 2016. p. 331.
- 575 26. Medema G, Been F, Heijnen L, Petterson S. Implementation of environmental surveillance for SARS-  
576 CoV-2 virus to support public health decisions: Opportunities and challenges. *Current Opinion in*  
577 *Environmental Science & Health*. 2020.
- 578 27. Bivins A, Greaves J, Fischer R, Yinda KC, Ahmed W, Kitajima M, et al. Persistence of SARS-CoV-  
579 2 in water and wastewater. *Environmental Science & Technology Letters*. 2020.
- 580 28. Corpuz MVA, Buonerba A, Vigliotta G, Zarra T, Ballesteros Jr F, Campiglia P, et al. Viruses in  
581 wastewater: occurrence, abundance and detection methods. *Science of the Total Environment*. 2020.  
582 p. 140910.

- 583 29. Naddeo V, Liu H. Editorial Perspectives: 2019 novel coronavirus (SARS-CoV-2): what is its fate in  
584 urban water cycle and how can the water research community respond? *Environmental Science:*  
585 *Water Research & Technology*. 2020. pp. 1213–1216.
- 586 30. Sharif S, Ikram A, Khurshid A, Salman M, Mehmood N, Arshad Y, et al. Detection of SARS-  
587 Coronavirus-2 in wastewater, using the existing environmental surveillance network: An  
588 epidemiological gateway to an early warning for COVID-19 in communities. *MedRxiv*. 2020.
- 589 31. Urban Volume – Central Bureau of Statistics. [cited 14 Mar 2021]. Available:  
590 <https://cbs.gov.np/urban-volume/>
- 591 32. QGIS Desktop. In: OSGeo [Internet]. [cited 14 Mar 2021]. Available:  
592 <https://www.osgeo.org/projects/qgis/>
- 593 33. OpenStreetMap contributors. Planet dump retrieved from <https://planet.osm.org>. 2017.
- 594 34. Michael-Kordatou I, Karaolia P, Fatta-Kassinou D. Sewage analysis as a tool for the COVID-19  
595 pandemic response and management: the urgent need for optimised protocols for SARS-CoV-2  
596 detection and quantification. *Journal of Environmental Chemical Engineering*. 2020;8: 104306.  
597 doi:10.1016/j.jece.2020.104306
- 598 35. Randazzo W, Truchado P, Cuevas-Ferrando E, Simón P, Allende A, Sánchez G. SARS-CoV-2 RNA  
599 in wastewater anticipated COVID-19 occurrence in a low prevalence area. *Water Research*. 2020. p.  
600 115942.
- 601 36. Farkas K, McDonald JE, Malham SK, Jones DL. Two-step concentration of complex water samples  
602 for the detection of viruses. *Methods and protocols*. 2018;1: 35.
- 603 37. BioRender. [cited 7 Mar 2021]. Available: <https://app.biorender.com/gallery>
- 604 38. BioRender. In: BioRender [Internet]. [cited 14 Mar 2021]. Available: <https://biorender.com/>
- 605 39. Quan P-L, Firth C, Street C, Henriquez JA, Petrosov A, Tashmukhamedova A, et al. Identification of  
606 a severe acute respiratory syndrome coronavirus-like virus in a leaf-nosed bat in Nigeria. *MBio*.  
607 2010;1.
- 608 40. De Coster W, D’Hert S, Schultz DT, Cruts M, Van Broeckhoven C. NanoPack: visualizing and  
609 processing long-read sequencing data. Berger B, editor. *Bioinformatics*. 2018;34: 2666–2669.  
610 doi:10.1093/bioinformatics/bty149
- 611 41. Wick R. Porechop. Github <https://github.com/rrwick/Porechop>. 2017.
- 612 42. Release Filtlong v0.2.0 · rrwick/Filtlong. In: GitHub [Internet]. [cited 16 Mar 2021]. Available:  
613 [/rrwick/Filtlong/releases/tag/v0.2.0](https://github.com/rrwick/Filtlong/releases/tag/v0.2.0)
- 614 43. Koren S, Walenz BP, Berlin K, Miller JR, Bergman NH, Phillippy AM. Canu: scalable and accurate  
615 long-read assembly via adaptive *k*-mer weighting and repeat separation. *Genome Res*. 2017;27: 722–  
616 736. doi:10.1101/gr.215087.116
- 617 44. Altschul SF, Gish W, Miller W, Myers EW, Lipman DJ. Basic local alignment search tool. *J Mol*  
618 *Biol*. 1990;215: 403–410. doi:10.1016/S0022-2836(05)80360-2

- 619 45. Quick J. nCoV-2019 sequencing protocol v3 (LoCost) V.3. University of Birmingham; 2020 Aug.  
620 Available: <https://www.protocols.io/view/ncov-2019-sequencing-protocol-v3-locost-bh42j8ye>
- 621 46. artic-network/rampart. ARTICnetwork; 2021. Available: <https://github.com/artic-network/rampart>
- 622 47. ARTIC: a bioinformatics pipeline for working with virus sequencing data sequenced with nanopore.  
623 In: GitHub [Internet]. [cited 31 Jan 2021]. Available: [https://github.com/artic-](https://github.com/artic-network/fieldbioinformatics)  
624 [network/fieldbioinformatics](https://github.com/artic-network/fieldbioinformatics)
- 625 48. Loman N, Rowe W, Rambaut A. nCoV-2019 novel coronavirus bioinformatics protocol. Artic  
626 Network. 2020.
- 627 49. Li H. Minimap2: pairwise alignment for nucleotide sequences. Birol I, editor. *Bioinformatics*.  
628 2018;34: 3094–3100. doi:10.1093/bioinformatics/bty191
- 629 50. Li H, Handsaker B, Wysoker A, Fennell T, Ruan J, Homer N, et al. The Sequence Alignment/Map  
630 format and SAMtools. *Bioinformatics*. 2009;25: 2078–2079. doi:10.1093/bioinformatics/btp352
- 631 51. czbiohub/sc2-illumina-pipeline. Chan Zuckerberg Biohub; 2021. Available:  
632 <https://github.com/czbiohub/sc2-illumina-pipeline>
- 633 52. Singer J, Gifford R, Cotten M, Robertson D. CoV-GLUE: a web application for tracking SARS-CoV-  
634 2 genomic variation. 2020.
- 635 53. Introduction to waterfall plots | Griffith Lab. [cited 12 Mar 2021]. Available:  
636 [https://genviz.org/module-03-genvisr/0003/02/01/waterfall\\_GenVisR/](https://genviz.org/module-03-genvisr/0003/02/01/waterfall_GenVisR/)
- 637 54. Mercatelli D, Giorgi FM. Geographic and genomic distribution of SARS-CoV-2 mutations. *Frontiers*  
638 *in microbiology*. 2020;11: 1800.
- 639 55. Skidmore ZL, Wagner AH, Lesurf R, Campbell KM, Kunisaki J, Griffith OL, et al. GenVisR:  
640 genomic visualizations in R. *Bioinformatics*. 2016;32: 3012–3014.
- 641 56. Boni MF, Lemey P, Jiang X, Lam TT-Y, Perry BW, Castoe TA, et al. Evolutionary origins of the  
642 SARS-CoV-2 sarbecovirus lineage responsible for the COVID-19 pandemic. *Nature Microbiology*.  
643 2020;5: 1408–1417.
- 644 57. Matyášek R, Kovařík A. Mutation patterns of human SARS-CoV-2 and bat RaTG13 coronavirus  
645 genomes are strongly biased towards C> U transitions, indicating rapid evolution in their hosts.  
646 *Genes*. 2020;11: 761.
- 647 58. GISAID - Initiative. [cited 29 Mar 2021]. Available: <https://www.gisaid.org/>
- 648 59. Douglas T, Young M. Virus particles as templates for materials synthesis. *Advanced Materials*.  
649 1999;11: 679–681.
- 650 60. Recombination, Reservoirs, and the Modular Spike: Mechanisms of Coronavirus Cross-Species  
651 Transmission | *Journal of Virology*. Available: <https://jvi.asm.org/content/84/7/3134>

- 652 61. Rambaut A, Holmes EC, O'Toole Á, Hill V, McCrone JT, Ruis C, et al. A dynamic nomenclature  
653 proposal for SARS-CoV-2 lineages to assist genomic epidemiology. *Nature microbiology*. 2020;5:  
654 1403–1407.
- 655 62. Chen J, Wang R, Wang M, Wei G-W. Mutations strengthened SARS-CoV-2 infectivity. *Journal of*  
656 *molecular biology*. 2020;432: 5212–5226.
- 657 63. Singh A, Steinkellner G, Köchl K, Gruber K, Gruber CC. Serine 477 plays a crucial role in the  
658 interaction of the SARS-CoV-2 spike protein with the human receptor ACE2. *Scientific reports*.  
659 2021;11: 1–11.
- 660 64. CDC. Coronavirus Disease 2019 (COVID-19). In: Centers for Disease Control and Prevention  
661 [Internet]. 11 Feb 2020 [cited 14 Mar 2021]. Available: [https://www.cdc.gov/coronavirus/2019-  
662 ncov/more/science-and-research/scientific-brief-emerging-variants.html](https://www.cdc.gov/coronavirus/2019-ncov/more/science-and-research/scientific-brief-emerging-variants.html)
- 663 65. Mahase E. Covid-19: What do we know about the late stage vaccine candidates? *British Medical*  
664 *Journal Publishing Group*; 2020.
- 665 66. COVID T. An integrated national scale SARS-CoV-2 genomic surveillance network. *The Lancet*  
666 *Microbe*. 2020.
- 667

668 **S1 Table: Blast result analysis of Coronavirus origin from sewage samples of Pilot phase**  
 669 **study**

| Sample sites | Query ID    | Accession           | Organism                  | Evalue    | SeqLen | Querycov | Identity |
|--------------|-------------|---------------------|---------------------------|-----------|--------|----------|----------|
| TH1          | tig00000001 | AL158839.11         | Human                     | 1.00E-119 | 788    | 86       | 99.6     |
|              | tig00000002 | KT254285.1          | Duck-dominant coronavirus | 0         | 480    | 99       | 96.26    |
|              | tig00000003 | KF293666.1          | Human coronavirus 229E    | 4.00E-78  | 466    | 44       | 92.96    |
|              | tig00000004 | MT655131.1          | SARS-CoV-2                | 0         | 472    | 92       | 98.17    |
|              | tig00000005 | KF294370.1          | Rat cov                   | 0         | 471    | 100      | 90.87    |
|              | tig00000006 | MN306040.1          | Human coronavirus NL63    | 0         | 391    | 100      | 99.49    |
|              | tig00000007 | no significant hits |                           |           |        |          |          |
| Te3          | tig00000001 | LR824127.1          | SARS-CoV-2                | 0         | 422    | 96       | 95.82    |
|              | tig00000001 | KT254285.1          | Duck-dominant coronavirus | 0         | 466    | 100      | 96.15    |
|              | tig00000002 | KF294370.1          | Rat cov                   | 2.00E-123 | 316    | 99       | 92.04    |
|              | tig00000003 | no significant hits |                           |           |        |          |          |
|              | tig00000004 | no significant hits |                           |           |        |          |          |
| TH2          | tig00000001 | KT254285.1          | Duck-dominant coronavirus | 0         | 475    | 99       | 96.2     |
|              | tig00000002 | KF294370.1          | Rat cov                   | 1.00E-125 | 327    | 99       | 91.38    |
| APF          | tig00000001 | MT628184.1          | SARS-CoV-2                | 3.00E-153 | 319    | 99       | 98.73    |

670

671 **S2 Table: Real time PCR data, viral load and population distribution of different sites.**  
 672 **Amplified genes- envelope (E), internal control (house-keeping gene, IC), RdRp and**  
 673 **nucleoplasmid (N) genes.**

| S.N. | Date       | Sampling Site | RT-PCR Result (Ct value) |      |      |        | Viral Load (viral copies per ml) | Est. human pop. Community |
|------|------------|---------------|--------------------------|------|------|--------|----------------------------------|---------------------------|
|      |            |               | E gene                   | IC   | RdRp | N gene |                                  |                           |
| 1.   | 26/7/2020  | BA-1          | -                        | -    | 35   | -      | -                                | 1486                      |
| 2.   | 26/7/2020  | BA-2          | 20.1                     | -    | -    | -      | -                                | 518                       |
| 3.   | 26/7/2020  | BA-3          | -                        | -    | -    | 36.4   | -                                | 636                       |
| 4.   | 10/09/2020 | GW13          | 33.9                     | 33.5 | 36.1 | 35.5   | 2090                             | Unknown                   |
| 5.   | 27/09/2020 | GW10          | 32.9                     | 29.9 | 37.3 | 34.7   | 1,950                            | 532                       |
| 6.   | 4/10/2020  | GW7           | 36.2                     | -    | -    | 34.5   | -                                | 330                       |
| 7.   | 9/11/2020  | GW11          | 25.9                     | 27.6 | 29.5 | 27.5   | 242000                           | 2367                      |
| 8.   | 11/11/2020 | GW14          | 28.0                     |      | 30.1 | 28.4   | 43100                            | Unknown                   |
| 9.   | 12/11/2020 | SA1           | 34.0                     | 35.6 | 36.2 | 33.8   | 295                              | 286                       |
| 10.  | 18/11/2020 | SA2           | 29.0                     | 30.5 | 30.5 | 29.6   | 28900                            | 81                        |
| 11.  | 19/11/2020 | SA7           | 27.5                     | 30.5 | 32.2 | 29.1   | 7840                             | 756                       |
| 12.  | 20/11/2020 | CH4           | 30.6                     | 30.3 | 33   | 31.0   | 3640                             | 700                       |
| 13.  | 22/11/2020 | KU1           | 28.0                     | 29.6 | 30.8 | 28.4   | 92,300                           | 1686                      |
| 14.  | 23/11/2020 | SA6           | 32.3                     | -    | 34.7 | 32.0   | 321                              | 101                       |
| 15.  | 24/11/2020 | SA5           | 27.8                     | 30.2 | 28.8 | 28.1   | 60,400                           | 400                       |
| 16.  | 25/11/2020 | SA4           | 28.4                     | 30.6 | 34.2 | 29.8   | 2820                             | 204                       |
| 17.  | 26/11/2020 | SA3           | 30.2                     | 28.6 | 34.3 | 30.6   | 1640                             | 191                       |
| 18.  | 27/11/2020 | SA9           | 30.4                     | 28.6 | 33.7 | 31.1   | 2390                             | 227                       |
| 19.  | 30/11/2020 | GW12          | 29                       | 30.9 | -    | 29.4   | -                                | Unknown                   |
| 20.  | 1/12/2020  | GW15          | 32.7                     | 26.3 | 33.1 | 32.6   | 3660                             | Unknown                   |

674

675 **S3 Table: AMPure bead clean up and DNA quantification data of pool1 & pool2 artc PCR**  
676 **products in positive sewage samples before Indexing (Pilot study)**

677

| S.N. | Sample ID  | ng of DNA present | Size of PCR product | Femtomoles of DNA present | Femtomoles of DNA required | ng of DNA required | Volume of DNA required | Volume of water required |
|------|------------|-------------------|---------------------|---------------------------|----------------------------|--------------------|------------------------|--------------------------|
| 1    | PL 1 Env5  | 4.86              | 400                 | 18.72                     | 200                        | 51.92              | 10.7                   | 39.3                     |
| 2    | PL 1 Env10 | 0.85              | 400                 | 3.27                      | 200                        | 51.92              | 60.7                   | -10.7                    |
| 3    | PL 1 E2    | 9.93              | 400                 | 38.25                     | 200                        | 51.92              | 5.2                    | 44.8                     |
| 4    | PL 2 Env5  | 2.45              | 400                 | 9.44                      | 200                        | 51.92              | 21.2                   | 28.8                     |
| 5    | PL 2 Env10 | 0.33              | 400                 | 1.27                      | 200                        | 51.92              | 156.7                  | -106.7                   |
| 6    | PL 2 E2    | 0.51              | 400                 | 1.96                      | 200                        | 51.92              | 102.7                  | -52.7                    |
| 7    | PL 1 env1  | 33.60             | 400                 | 129.43                    | 200                        | 51.92              | 1.5                    | 48.5                     |
| 8    | PL 1 env2  | 28.60             | 400                 | 110.17                    | 200                        | 51.92              | 1.8                    | 48.2                     |
| 9    | PL 2 env1  | 1.59              | 400                 | 6.12                      | 200                        | 51.92              | 32.7                   | 17.3                     |
| 10   | PL 2 env2  | 2.05              | 400                 | 7.9                       | 200                        | 51.92              | 25.3                   | 24.7                     |



678 **S4 Table: AMPure bead clean up and DNA quantification data of pool1 & pool2 ARTIC PCR products in positive sewage**  
 679 **samples before indexing**

| S.N | SAMPLE ID | VOLUME | AMPURE BEAD | READING 1 | READING 2 | READING 3 | Average | ng for 100 fm w/ 400bp | Vol. of DNA |
|-----|-----------|--------|-------------|-----------|-----------|-----------|---------|------------------------|-------------|
| 1.  | GW11 (P1) | 19     | 26.6        | 13.2      | 13.3      | 13.3      | 13.27   | 25.96                  | 2.0         |
| 2.  | SA2 (P1)  | 19     | 26.6        | 5.48      | 5.48      | 5.5       | 5.49    | 25.96                  | 4.7         |
| 3.  | SA7 (P1)  | 19     | 26.6        | 8.96      | 8.96      | 9         | 8.97    | 25.96                  | 2.9         |
| 4.  | CH4 (P1)  | 38     | 53.2        | 2.02      | 2.02      | 2.02      | 2.02    | 25.96                  | 12.9        |
| 5.  | KU1 (P1)  | 19     | 26.6        | 6.08      | 6.08      | 6.08      | 6.08    | 25.96                  | 4.3         |
| 6.  | SA5 (P1)  | 19     | 26.6        | 8.1       | 8.1       | 8.12      | 8.11    | 25.96                  | 3.2         |
| 7.  | GW11 (P2) | 19     | 26.6        | 10.1      | 10.1      | 10.1      | 10.10   | 25.96                  | 2.6         |
| 8.  | SA2 (P2)  | 19     | 26.6        | 6.58      | 6.6       | 6.6       | 6.59    | 25.96                  | 3.9         |
| 9.  | SA7 (P2)  | 19     | 26.6        | 3.98      | 4         | 4         | 3.99    | 25.96                  | 6.5         |
| 10. | CH4 (P2)  | 38     | 53.2        | 8.9       | 8.92      | 8.94      | 8.92    | 25.96                  | 2.9         |
| 11. | KU1 (P2)  | 19     | 26.6        | 6.72      | 6.72      | 6.74      | 6.73    | 25.96                  | 3.9         |
| 12. | SA5 (P2)  | 19     | 26.6        | 8.1       | 8.1       | 8.1       | 8.10    | 25.96                  | 3.2         |
| 13. | GW10(P1)  | 20     | 28          | 1.02      | 1.03      | 1.04      | 1.03    | 25.96                  | 25.0        |
| 14. | GW13(P1)  | 20     | 28          | 1.3       | 1.3       | 1.31      | 1.30    | 25.96                  | 19.8        |
| 15. | GW14(P1)  | 20     | 28          | 16.2      | 16.3      | 16.3      | 16.26   | 25.96                  | 1.6         |
| 16. | SA1(P1)   | 20     | 28          | 0.474     | 0.46      | 0.452     | 0.46    | 25.96                  | 57.4        |
| 17. | SA6(P1)   | 20     | 28          | 4.16      | 4.18      | 4.2       | 4.18    | 25.96                  | 6.2         |
| 18. | SA4(P1)   | 20     | 28          | 9.9       | 9.92      | 9.94      | 9.92    | 25.96                  | 2.6         |
| 19. | SA3(P1)   | 20     | 28          | 0.448     | 0.45      | 0.452     | 0.45    | 25.96                  | 57.4        |
| 20. | SA9(P1)   | 20     | 28          | 3.9       | 3.9       | 3.92      | 3.91    | 25.96                  | 6.6         |
| 21. | GW12(P1)  | 20     | 28          | 3.5       | 3.5       | 3.52      | 3.51    | 25.96                  | 7.4         |
| 22. | GW15(P1)  | 20     | 28          | 36        | 36        | 36        | 36      | 25.96                  | 0.7         |
| 23. | GW10(P2)  | 20     | 28          | 1.06      | 1.07      | 1.07      | 1.06    | 25.96                  | 24.3        |
| 24. | GW13(P2)  | 20     | 28          | 4.14      | 4.14      | 4.14      | 4.14    | 25.96                  | 6.3         |
| 25. | GW14(P2)  | 20     | 28          | 24.6      | 24.6      | 24.6      | 24.6    | 25.96                  | 1.1         |
| 26. | SA1(P2)   | 20     | 28          | 0.936     | 0.936     | 0.938     | 0.94    | 25.96                  | 27.7        |
| 27. | SA6(P2)   | 20     | 28          | 3.6       | 3.2       | 2.92      | 3.24    | 25.96                  | 8.9         |
| 28. | SA4(P2)   | 20     | 28          | 11.9      | 11.9      | 11.6      | 11.8    | 25.96                  | 2.2         |
| 29. | SA3(P2)   | 20     | 28          | 6.28      | 6.28      | 6.28      | 6.28    | 25.96                  | 4.1         |
| 30. | SA9(P2)   | 20     | 28          | 4.22      | 4.22      | 4.24      | 4.22    | 25.96                  | 6.1         |
| 31. | GW12(P2)  | 20     | 28          | 8.24      | 8.24      | 8.26      | 8.24    | 25.96                  | 3.1         |
| 32. | GW15(P2)  | 20     | 28          | 4.36      | 4.36      | 4.36      | 4.36    | 25.96                  | 6.0         |

680
